40 Chun-Hao Hung  
41 The PhD Program for Neural Regenerative Medicine  
42 Taipei Medical University  
43 Taipei 115, Taiwan, ROC  
44 E-mail: [libur777@hotmail.com](mailto:libur777@hotmail.com)  
45

46 **Abstract**

47 A causal relationship exists among the aging process, organ decay and dis-function, and the  
48 occurrence of various diseases including cancer. A genetically engineered mouse model,  
49 termed *Eklf*<sup>K74R/K74R</sup> or *Eklf*(K74R), carrying mutation on the well-conserved sumoylation site  
50 of the hematopoietic transcription factor KLF1/ EKLK has been generated that possesses  
51 extended lifespan and healthy characteristics including cancer resistance. We show that the  
52 high anti-cancer capability of the *Eklf*(K74R) mice are gender-, age- and genetic  
53 background-independent. Significantly, the anti-cancer capability and extended lifespan  
54 characteristics of *Eklf*(K74R) mice could be transferred to wild-type mice via transplantation  
55 of their bone marrow mononuclear cells. Targeted/global gene expression profiling analysis  
56 has identified changes of the expression of specific proteins and cellular pathways in the  
57 leukocytes of the *Eklf*(K74R) that are in the directions of anti-cancer and/or anti-aging. This  
58 study demonstrates the feasibility of developing a novel hematopoietic/ blood system for  
59 long-term anti-cancer and, potentially, for anti-aging.

60  
61  
62  
63  
64  
65  
66  
67  
68  
69  
70  
71  
72

73

74 **Introduction**

75 Aging of animals, including humans, is accompanied by lifespan-dependent organ  
76 deterioration and the occurrence of chronic diseases such as cancer, diabetes, cardiovascular  
77 failure and neurodegeneration<sup>1,2</sup>. To extend healthspan and lifespan, various biomedical- and  
78 biotechnology-related strategies have been intensively developed and applied, including the  
79 therapy of different diseases such as cancer<sup>3-5</sup>. The hematopoietic/ blood system is an  
80 important biomedical target for anti-aging and anti-cancer research development. Multiple  
81 blood cell lineages arise from hematopoietic stem cells (HSCs), with the lymphoid lineage  
82 giving rise to T, B, and natural killer (NK) cell populations, whereas the myeloid lineage  
83 differentiates into megakaryocytes, erythrocytes, granulocytes, monocytes and  
84 macrophages<sup>6-8</sup>. The genetic constituents and homeostasis of the hematopoietic system are  
85 regulated epigenetically and via environmental factors to maintain animal health<sup>6,9</sup>.

86 EKLF, also named KLF1, is a Krüppel-like factor that is expressed in a range of blood  
87 cells including erythrocytes, megakaryocytes, T cells, NK cells, as well as in various  
88 hematopoietic progenitors including common-myeloid-progenitor,  
89 megakaryocyte-erythroid-progenitor (MEP), and granulocyte-macrophage-progenitor<sup>10-12</sup>.  
90 The factor regulates erythropoiesis<sup>13</sup> and the differentiation of MEP to megakaryocytes and  
91 erythrocytes<sup>10,14</sup> as well as of monocytes to macrophages<sup>15</sup>. EKLF is also expressed in HSC  
92 and regulates their differentiation<sup>16</sup>. The factor can positively or negatively regulate  
93 transcription through binding of its zinc finger domain to the CACCC motif of the regulatory  
94 regions of a diverse array of genes<sup>16-19</sup>.

95 EKLF could be sumoylated *in vitro* and *in vivo*, and sumoylation of the lysine at codon  
96 74 of mouse EKLF altered the transcriptional regulatory function<sup>10</sup> as well as nuclear import<sup>20</sup>  
97 of the factor. Surprisingly, homozygosity of a single amino acid substitution, lysine(K) to  
98 arginine(R), at the sumoylation site of EKLF results in the generation of a novel mouse model  
99 with healthy longevity. These mice, termed *Eklf*<sup>K74R/K74R</sup> or *Eklf*(K74R), exhibited extended  
100 healthspan and lifespan. In particular, the *Eklf*(K74R) mice showed delay of the  
101 age-dependent decline of physical performance, such as the motor function and spatial  
102 learning/memory capability, and deterioration of the structure/function of tissues including  
103 the heart, liver, and kidney. Furthermore, the *Eklf*(K74R) mice appeared to have significantly  
104 higher anti-cancer capability than the WT mice<sup>21</sup>.

105 As described in the following, we have since characterized the high anti-cancer  
106 capability of the *Eklf*(K74R) mice with respect to its dependence on the age, gender and  
107 genetic background. More importantly, we have demonstrated that the high anti-cancer ability  
108 of these genetically engineered mice could be transferred to wild type mice (WT) through  
109 hematopoietic transplantation of the bone marrow mononuclear cells (BMMNC).  
110 Furthermore, we show that the higher anti-cancer capability and extended life span of  
111 *Eklf*(K74R) mice are associated with changes of the global protein expression profile and  
112 specific aging-/cancer-associated cellular signaling pathways in their white blood cells  
113 (WBC), or leukocytes.

114  
115

## 116 **Result**

### 117 **Characterization of the cancer resistance of *Eklf*(K74R) mice in relation to age, gender, 118 and genetic background**

119 The *Eklf*(K74R) mice appeared to be cancer resistant to carcinogenesis as manifested by  
120 their lower spontaneous cancer incidence (12.5%) in life than WT mice (75%). The  
121 *Eklf*(K74R) mutation also protected the mice from metastasis in the experimental metastasis  
122 assay and it reduced tumor growth in the subcutaneous cancer cell inoculation assay<sup>21</sup>. We  
123 have used the pulmonary melanoma foci assay to further characterize the higher cancer  
124 resistance of the *Eklf*(K74R) mice with respect to the effects of gender/age/genetic  
125 background of the mice and the requirement of the homozygous K74R mutation.

126 It appeared that male as well as female *Eklf*(K74R) mice in the B6 genetic background  
127 had significantly fewer pulmonary melanoma foci than the corresponding WT mice (Figure 1).  
128 Because of this result, we used male mice for all of the studies describe below. First, both  
129 young (2-month-old) and aged (24-month-old) *Eklf*(K74R) mice had higher anti-metastasis  
130 ability against the injected melanoma cells than WT mice of age-dependent groups (Figure  
131 1A and 1B). Secondly, homozygosity of the K74R substitution was required for the higher  
132 cancer resistance of the *Eklf*(K74R) mice (Figure S1). Consistent with the previous study<sup>21</sup>,  
133 the *Eklf*(K74R) mice survived longer than the WT mice after the injection of B16-F10 cells.  
134 Importantly, the *Eklf*(K74R) mice in the FVB background also exhibited high cancer  
135 resistance than FVB WT mice by this assay (Figure 1C), suggesting that cancer resistance of  
136 *Eklf*(K74R) mice conferred by the homozygous K74R substitution was likely genetic  
137 background-independent. Finally, the higher anti-cancer capability of the *Eklf*(K74R) mice

138 did not appear to depend on the arginine at codon 74, since *Eklf*(K74A) mice carrying K→A  
139 amino acid substitution at the K74 sumoylation site also exhibited higher anti-metastasis  
140 capability than WT mice in the pulmonary foci assay (Figure 1D).

141

142 **Transfer of the anti-cancer capability and extended lifespan of *Eklf*(K74R) mice to WT**  
143 **mice via BMT**

144 Since EKLF is a hematopoietic transcription factor expressed not only in mature blood  
145 cells but also in HSCs and hematopoietic stem progenitor cells, this cancer resistance may be  
146 transferable by means of BMT. This possibility was tested with uses of male mice and a  
147 standard BMT protocol<sup>22</sup>. BMMNC were purified from the bone marrow of 2-month-old  
148 CD45.2 *Eklf*(K74R) or WT mice and injected into the tail vein of CD45.1 WT recipient mice.  
149 Blood replacement of recipient mice with 10Gy  $\gamma$ -irradiation by that of the donor mice  
150 reached 90% at 7<sup>th</sup>-week (Figure 2A and 2B). After 2 weeks, the recipient mice were injected  
151 with B16-F10 cells and then sacrificed a further 2 weeks later to quantify pulmonary tumor  
152 foci. We found that WT mice transplanted with WT BMMNC had similarly high numbers of  
153 tumor foci relative to WT mice without BMT (Figure 2C and 1A). However, similar to  
154 *Eklf*(K74R) mice challenged with B16-F10 cells (Figure 1B), WT mice that received  
155 BMMNC from *Eklf*(K74R) mice presented significantly fewer tumor foci on their lungs  
156 (Figure 2C). Notably, BMT using 24-month-old donor mice gave similar result (Figure S2A).

157 In order to determine if WT mice having more restricted blood replacement upon BMT  
158 from *Eklf*(K74R) mice still exhibited a higher anti-cancer capability, we also carried out BMT  
159 experiments with lower doses of  $\gamma$ -irradiation. BMT using two lower doses of  $\gamma$ -irradiation  
160 (2.5Gy/5Gy) still resulted in transfer of cancer resistance from *Eklf*(K74R) to WT mice.  
161 Approximately 40% of recipient blood cells were substituted by donor cells upon BMT with  
162 5Gy  $\gamma$ -irradiation. Consequently, at that irradiation dosage, BMT from *Eklf*(K74R) mouse  
163 donors reduced the average number of pulmonary tumor foci in recipient WT mice to 5. On  
164 the other hand, only 20% blood replacement was achieved in the recipient mice with 2.5Gy  
165  $\gamma$ -irradiation (Figure 2D). However, the WT mice receiving BMT from *Eklf*(K74R) mice  
166 again developed less number (~10/mouse) of pulmonary tumor foci than those WT mice  
167 receiving BMT from the WT mice (Figure 2D). Thus, even at a low level of 20% blood  
168 replacement, BMT still enabled effective transfer of cancer resistance from *Eklf*(K74R) mice  
169 to WT mice.

170 In addition, we also attempted to transfer the extended lifespan characteristics of the  
171 *Eklf*(K74R) mice to WT mice by BMT. Significantly, the medium lifespan of WT mice

172 receiving BMT from *Eklf*(K74R) mice was 5 months longer than that of WT mice receiving  
173 BMT from WT mice (Figure S2B). Thus, the longer lifespan characteristics of the *Eklf*(K74R)  
174 mice was also transferable via BMT.

175

#### 176 **Inhibition of tumor growth by transplanted BMMNC from *Eklf* K74R) mice**

177 Our experiments indicated that *Eklf*(K74R) bone marrow carried the anti-metastasis  
178 capability that prevented melanoma cell colonization on the lungs of recipient mice (Figures.  
179 1 and 2). To determine if *Eklf*(K74R) BMT could inhibit tumor growth, we examined the  
180 effect of BMT on growth of tumors with B16-F10-luc cells. As outlined in Figure 3A, ten  
181 days after injection of cancerous cells, the formation of bioluminescent signals in the recipient  
182 mice were confirmed by the observation of *in vivo* bioluminescence. The following day, we  
183 transplanted the recipient mice with BMMNC from WT or *Eklf*(K74R) mice and then  
184 measured the intensities of bioluminescence signals from tumors 7 and 14 days later. As  
185 shown, tumor growth in mice subjected to BMT from *Eklf*(K74R) mice was significantly  
186 slower relative to those receiving BMMNC from WT mice (Figure 3B and 3C). Thus,  
187 *Eklf*(K74R) BMMNC indeed can inhibit the growth of tumor more effectively than WT  
188 BMMNC.

189

#### 190 **Differential expression of specific immune-, ageing- and/or cancer- associated** 191 **biomolecules in the blood of *Eklf*(K74R) mice**

192 The K74R substitution did not alter the expression levels of EKLF in the bone marrow,  
193 fetal liver<sup>21</sup> and the PB cells (Figure S1D), neither did it affect much the PB populations as  
194 shown by CBC analysis<sup>21</sup>. We further analyzed the PB populations by flow cytometry of WT  
195 and *Eklf*(K74R) mice of the ages 3 and 24 months, respectively. The frequency of *Eklf*(K74R)  
196 NK1.1<sup>+</sup> cells were higher than WT NK1.1<sup>+</sup> cells at aged mice. The latter observation  
197 correlated with the finding by Shyu *et al.* that the NKT cells in PB cells of 24-month-old  
198 *Eklf*(K74R) mice was higher than that of 24-month-old WT mice (Figure S3).

199 We first used RT-qPCR to analyze the levels in PB cells of mRNAs encoding the  
200 immune checkpoint genes (ICGs) PD-1/PD-L1<sup>23</sup> in view of the cancer resistance of  
201 *Eklf*(K74R) mice (Figure 4) as well as increased levels of PD-1 and PD-L1 in aged or  
202 tumorigenic mice<sup>24</sup>. As shown in Figure 4, the mRNA levels of *Pd-1* and *Pd-l1* in the PB, B  
203 cells and T cells of WT mice were both increased during aging. In great contrast, the mRNA  
204 levels and protein levels of these two genes were lower in 3-month-old *Eklf*(K74R) mice than  
205 the age-matched WT mice, and they remained low during ageing of the *Eklf*(K74R) mice.

206 Importantly, EKLK positively regulated expression of both *Pd-1* and *Pd-11* at the  
207 transcriptional level, as demonstrated by RNAi knockdown experiments in splenic CD3<sup>+</sup> T  
208 cells (Figure 4C). As expected, lower levels of *Pd-1* and *Pd-11* expression were also observed  
209 in the PB of mice receiving BMT from *Eklf*(K74R) mice (Figure S2C). These findings  
210 indicate that the low tumorigenesis rate of *Eklf*(K74R) mice arises in part from low  
211 expression of the ICGs, *Pd-1* and *Pd-11*.

212 We have also examined, by bead-based multiplex assay<sup>25,26</sup>, the expression patterns of  
213 several ageing- and/or cancer- associated cytokines. As shown in Figure S4, there was no  
214 significant difference in the serum levels of IL-1 $\beta$ , IL-2, IL-10, IL-12p70, INF- $\gamma$  or TNF- $\alpha$   
215 between WT and *Eklf*(K74R) mice at 24-month-old. In contrast, the level of IL-4, an  
216 anti-inflammatory cytokine<sup>27</sup> beneficial to the hippocampus of aging mice<sup>28</sup>, in 24-month-old  
217 *Eklf*(K74R) mice was 3-4 fold higher than the 24-month-old WT mice. On the other hand, the  
218 level of IL-6, a key factor in chronic inflammatory diseases, autoimmunity, cytokine storm  
219 and cancer<sup>26,29</sup>, increased only moderately during aging of the *Eklf*(K74R) mice (Figure S4).  
220 Thus, similar to PD-1 and PD-L1, the altered expression of some of the cytokines in the blood  
221 likely contributes to the anti-aging and/or anti-cancer characteristics of the *Eklf*(K74R) mice.

222

### 223 **Comparative proteomics analysis of the leukocytes of *Eklf*(K74R) mice and WT mice**

224 We proceeded to examine age-dependent cell-intrinsic changes in the proteomes of the  
225 leukocytes from the WT and *Eklf*(K74R) mice in two different age groups. 259 and 306  
226 differentially expressed proteins (DEPs) were identified between the two age groups for the  
227 WT and *Eklf*(K74R) mice, respectively (Figure S5A). To understand the correlations of these  
228 proteins with aging and cancer, we performed the GSEA and found that the age-dependent  
229 DEPs changed in the concordant direction in the WT and *Eklf*(K74R) mice were enriched for  
230 several known aging-related pathways, e.g. IL-6-JAK-STAT3 signaling, DNA repair, etc<sup>30</sup>  
231 (Figure S5B). Meanwhile, the age-dependent DEPs changed in the reverse directions in the  
232 WT and *Eklf*(K74R) mice were enriched for nine other aging-related pathways (Figure S5C).

233 We further performed DEP analyses between WT and *Eklf*(K74R) mice and identified  
234 strain-dependent DEPs in the two age groups. As shown in Figure S5D, only 7 DEPs were  
235 identified in the 3-month-old mice but 40 DEPs in the 24-month-old ones. Of the 40 DEPs in  
236 the elder mice, 3 and 37 were upregulated in *Eklf*(K74R) and WT mice, respectively (Figure  
237 S4D). Significantly, GSEA analysis of these DEPs showed that elder *Eklf*(K74R) leukocytes  
238 were enriched for the anti-aging pathways related to hypoxia, and p53 signaling, etc.<sup>31,32</sup>,  
239 while the elder WT leukocytes were enriched for the aging-associated pathways related to

240 apoptosis, and mTORC1 signaling, etc.<sup>31,33</sup>. On the other hand, the DEPs in elder *Eklf*(K74R)  
241 leukocytes were also enriched for anti-cancer pathways related to the interferon- $\alpha$  response,  
242 and TGF- $\beta$  signaling, etc.<sup>34-36</sup> (Figure S5E), while DEPs in the elder WT leukocytes were  
243 enriched for the pro-cancer pathways related to IL-6-JAK-STAT3 signaling and  
244 angiogenesis<sup>37</sup>. These data together have demonstrated that *Eklf*(K74R) leukocytes contribute  
245 to their anti-cancer capability and long lifespan through several specific cellular signaling  
246 pathways.

## 247 **Discussion**

248 Because of the complexity and intercrosses of the different pathways regulating the  
249 health and the aging process, genetic manipulation of non-human animals<sup>38,39</sup> and non-genetic  
250 approaches on animals including human<sup>4,40,41</sup> targeting these pathways inevitably lead to  
251 moderate-to-severe side effects such as body weight loss, adiposity, etc.. With respect to the  
252 above, the *Eklf*(K74R) mice<sup>21</sup> is ideal as an animal model for further insightful understanding  
253 of the ageing process as well as for biomedical development of new anti-ageing tools and  
254 approaches. Indeed, the studies reported above on the hematopoietic transfer of the  
255 anti-cancer capability and extended lifespan of *Eklf*(K74R) mice have demonstrated the  
256 feasibility of a novel hematopoietic blood system for anti-disease and anti-ageing.

257 The anti-cancer capability of the *Eklf*(K74R) mice have rendered them relatively free  
258 from spontaneous cancer occurrence<sup>21</sup>, which is also reflected by their resistance to  
259 tumorigenesis of the B16-F10 cells and LLC1 cells in the cancer-growth inhibition assay<sup>21</sup>  
260 (Figures. 1 and 3). Furthermore, the cancer resistance of *Eklf*(K74R) mice appears to be  
261 independent of the gender, age, and genetic background (Figure 1). The anti-metastasis  
262 property of the *Eklf*(K74A) mice in the pulmonary foci assay (Figure 1D) also indicates that  
263 the anti-cancer capability of the *Eklf*(K74R) mice is not due to the structural and/or  
264 post-translational properties of the arginine introduced at codon 74 of EKLF. Importantly, we  
265 have shown that the anti-cancer capability and the extended lifespan characteristics of  
266 *Eklf*(K74R) mice are transferrable through BMT (Figures. 2, 3, and S2B). In particular, we  
267 show that BMMNC from *Eklf*(K74R) mice (Figure 2A and S2A) could confer 2-month-old  
268 WT recipient mice with the anti-cancer capability. Furthermore, ~20% of blood substitution  
269 would allow the recipient mice to become cancer resistant in the pulmonary foci assay (Figure  
270 2D). Also, WT mice receiving BMMNC at 2-month-old *Eklf*(K74R) mice would live longer  
271 than those receiving WT BMMNC (Figure S2B). In interesting parallel, infusion of  
272 HSC(K74R) could extend the life span of aged WT recipient mice<sup>21</sup>. Hematopoietic stem cell



273 therapy for different diseases<sup>42-45</sup> including cancer has been intensively explored and practiced  
274 such as leukemia, and neuroblastoma, etc<sup>46,47</sup>. Also, certain characteristics of the young mice  
275 could be transferred to old mice via heterochronic parabiosis or heterochronic  
276 transplantation<sup>48-51</sup>. Similarly, plasma proteins from human umbilical cord blood can  
277 revitalize hippocampal function and neuroplasticity in aged mice<sup>52,53</sup>. Thus,  
278 transplantation/transfer of the blood MNC carrying homozygous mutation at the sumoylation  
279 site of EKLF could be developed as a new approach for anti-cancer cell, long-term anti-aging  
280 and rejuvenation.

281 The tumorigenesis resistance and long lifespan exhibited by the *Eklf*(K74R) mice are  
282 most likely due to changes in the transcription regulatory properties of the mutant  
283 EKLF(K74R) protein relative to WT<sup>54</sup>. As exemplified in Figure 4A and 4B, expression  
284 levels of the ICGs *Pd-1* and *Pd-11* in the PB, B, and T cells of *Eklf*(K74R) mice are reduced  
285 in comparison to the WT mice. Notably, cancer incidence increases with aging<sup>55</sup>, which is  
286 accompanied by increased expression of PD-1 and PD-L1<sup>56</sup>. The lower expression of ICGs  
287 would contribute to the anti-cancer capabilities of the *Eklf*(K74R) blood to fight against  
288 cancer (Figures. 1, 2, and 3) and to extension of the lifespan of cancer-bearing mice<sup>21</sup>. Given  
289 that EKLF is expressed in HSCs<sup>16</sup>, B cells, T cells<sup>12</sup>, NK cells and macrophages (bio-GPS  
290 database), and that RNAi knockdown of *Eklf* expression significantly reduced *Pd-1* and *Pd-11*  
291 mRNA levels in splenic CD3<sup>+</sup> T cells (Figure 4C), we assert that this protein is an upstream  
292 transcriptional regulator of the *Pd-1* and *Pd-11* genes and, more generally, it regulates the  
293 transcriptomes of a diverse range of hematopoietic cells. Indeed, similar to ICGs, the  
294 expression levels of several cytokines in the *Eklf*(K74R) blood/serum are also different from  
295 the WT blood and some of the changes during ageing or carcinogenesis in the *Eklf*(K74R)  
296 blood are opposite to the blood/serum of WT mice<sup>26</sup> (Figure S4).

297 Previously, the transcriptome data have been used to dissect the regulation of leukocyte  
298 aging<sup>30,57,58</sup>. In addition, proteomic analysis has revealed the signaling pathways that regulate  
299 aging of specific types of leukocyte such as the lymphocyte and neutrophils cells<sup>59,60</sup>. In this  
300 study, we have performed proteomics analysis of leukocytes from WT and *Eklf*(K74R) mice  
301 in two age groups, and found that for the elder mice, the strain-dependent DEPs in the  
302 leukocytes are enriched for a number of signaling pathways. Among these signaling pathways,  
303 at least 12 of them are closely associated with the aging process, which include hypoxia,  
304 DNA repair, etc. (Figure S5E). As summarized by the model in Figure S5F, it appears that  
305 changes of these pathways in the elder *Eklf*(K74R) leukocytes relative to the elder WT  
306 leukocytes are mostly in the direction of anti-aging. The data of Figure S4 together strongly

307 suggest that the *Eklf*(K74R) amino acid substitution causes a change in the global gene  
308 expression profile of the leukocytes, which contributes to the high anti-cancer capability and  
309 long lifespan of the *Eklf*(K74R) mice.

310 In sum, we have characterized the cancer resistance of the *Eklf*(K74R) mice, among their  
311 other healthy characteristics, in relation to gender, age, and genetic background. We also have  
312 identified cell populations, gene expression profiles and cellular signaling pathways of the  
313 white blood cells of young and old mutant mice, in comparison to the WT ones, that are  
314 changed in the anti-cancer and/or anti-ageing directions. Finally, the transferability of the  
315 cancer resistance and extended life-span of the mutant mice via transplantation of BMMNC  
316 suggests the possibility of future development of hematopoietic blood cells genome-edited at  
317 the conserved sumoylation site of EKLF for anti-cancer and the extension of healthspan  
318 and/or lifespan in animals including human.

319

### 320 **Acknowledgments**

321 We thank Ya-Min Lin and her colleagues at the FACS Core for their efforts on the cell  
322 sorting. We also thank Taiwan Mouse Clinic facility for expertise help on the IVIS  
323 experiments. The effort by Dr. Ching-Yen Tsai at the Transgenic Core Facility, IMB, is  
324 greatly appreciated. The Immune Monitoring Core of Taipei Medical University provided  
325 great help in the analysis of the blood cell populations. We also thank the Bioinformatics  
326 Core Facility, IMB, for its efforts on the proteomics analysis.

327

### 328 **Competing interests**

329 The authors declare there is no conflict of interest.

330

### 331 **Animal**

332 All the animal procedures were approved by the Institute of Animal Care and Use  
333 Committees, IACUC, at Academia Sinica. The IACUC numbers are 17-02-1052, 17-12-1142,  
334 20-10-1528, BioTReC-110-M-005, and BioTReC-111-M-004, respectively.

335

### 336 **Author Contributions**

337 C.-H.H., designed and performed experiments, analyzed data and co-wrote the helped paper.;  
338 K.-Y.W., J.-P.W. and T.-L.L. performed experiments and analyzed data.; Y.-H.L. provided  
339 technology expertise; Z.-S.L. and Y.-H.L. provided essential mouse strains and experimental

340 knowledge.; P.-W.H. provided essential cell-line strains and experimental knowledge.;  
341 Y.-H.L., N.-S.L., and Y.-C.S., provided essential mouse strains.; C.-C.L., K.-H.Y., C.-H.A.Y.  
342 and T.-J.C. analyses of the bioinformatics data and co-wrote the paper. Y.-H.L. and N.-S.L.  
343 provided technology expertise, ideas and essential materials.; Y.-C.S. and C.-K.J.S. provided  
344 ideas, supervised the research and co-wrote the paper.

345

#### 346 **Funding**

347 This work was supported by Taipei Medical University (to C.-K. J. S.), Academia Sinica (to  
348 C.-K. J. S.), Chang-Gung University (CMRPG2J0341 to Y.-C. S.), and MOST grants (NSC  
349 102-2320-B-001-010 to N.-S. L., MOST 103-2311-B-010-003 Y.-C. S., and MOST  
350 110-2628-B-001-024 to L.-Y. C.).

351

#### 352 **Availability of data and materials**

353 The data that support the findings of this study are available from the corresponding authors  
354 upon request.

355

#### 356 **Material and Methods**

##### 357 **Mice**

358 C57BL/6, B6, and FVB mice were purchased from Jackson Laboratories (Bar Harbor,  
359 Maine). The B6 *Eklf*(K74R), B6 *Eklf*(K74A) and FVB *Eklf*(K74R) mice were established  
360 with the assistance of the Transgenic Core Facility (TCF), IMB, Academia Sinica, Taiwan.  
361 As described previously<sup>21</sup>, the K74R mutation was introduced by homologous recombination  
362 into exon 2 (E2) of the *Eklf* gene of B6 mice by means of a recombinant retrovirus containing  
363 the construct loxP-PGK-gb2-neo-loxP-E2 (K74R), before excising the neomycin (neo)  
364 selection marker by crossing with Ella-Cre mice. The heterozygous *Eklf*(K74R/+) mice were  
365 then crossed to obtain homozygous mutant *Eklf*(K74R/K74R) mice, hereafter termed  
366 *Eklf*(K74R) mice.

367 On the other hand, *Eklf*(K74A) mice were generated by using the CRISPR/Cas9 system.  
368 Female B6 mice (7- to 8-week-old) were mated with B6 males and the fertilized embryos  
369 were collected from the oviducts. For oligos injection, Cas mRNA (100 ng/μl), sgRNA (50  
370 ng/μl), and donor oligos (100 ng/μl) were mixed and injected into the zygotes at the pronuclei  
371 stage. The F0 mice were genotyped by PCR and DNA sequencing. The heterozygous

372 *Eklf*(K74A/+) mice were crossed to establish the germ-line stable homozygous *Eklf*(K74A)  
373 F1 strain.

374 *Eklf*(K74R) mice in the FVB background were generated using an in vitro fertilization  
375 strategy. Briefly, sperm from male B6 *Eklf*(K74R) mice was used to fertilize FVB mouse  
376 oocytes. In vitro fertilizations of FVB oocytes were carried out consecutively for five  
377 generations. The resulting chimeric mice with >90% FVB background were then crossed with  
378 FVB mice for another five generations or more.

379

### 380 **Cell lines**

381 Murine B16-F10 melanoma cell lines were purchased from ATCC (CRL-6475).  
382 B16-F10 cells expressing luciferase (B16-F10-luc) were generated as described previously<sup>61</sup>.  
383 All cell lines were derived from cryopreserved stocks split fewer than three times and they  
384 were confirmed as mycoplasma-free prior to use. B16-F10 cells were cultured at 37 °C and 5  
385 % CO<sub>2</sub> in DMEM medium supplemented with 10 % FBS, 1 % penicillin/streptomycin, and 2  
386 mM L-glutamine. B16-F10-luc cells were selected at 37 °C and 5 % CO<sub>2</sub> in a DMEM  
387 medium supplemented with 0.2 mg/mL zeocin (Invitrogen), 10 % FBS, 1 %  
388 penicillin/streptomycin, and 2 mM L-glutamine.

389

### 390 **Experimental melanoma metastasis assay**

391 Cultured B16-F10 melanoma cells (1x10<sup>5</sup>, 2x10<sup>5</sup>, 5x10<sup>5</sup> cells/mouse) were injected into  
392 mouse tail vein of 8- to 9-week-old or 24-month-old *Eklf*(K74R) and WT mice with/ without  
393 bone marrow transplantation. Two weeks after injection, the mice were sacrificed and the  
394 number of tumor foci on their lungs was quantified<sup>62</sup>.

395

### 396 **Flow cytometric analysis and cell sorting**

397 Single cell suspensions of the peripheral blood cells and spleen tissue of B6 mice were  
398 prepared by lysing red blood cells and then passing them through a 40-µm cell strainer  
399 (Falcon®). Bone marrow mononuclear cells (BMMNCs) were prepared as described below in  
400 the section **Bone marrow transplantation (BMT)**. The peripheral blood cells and  
401 splenocytes were stained extracellularly for 30 min at room temperature using different  
402 combinations of the following antibodies: anti-CD45.1 (eBioscience); anti-CD45.2  
403 (eBioscience); anti-CD3e (eBioscience); anti-CD45R (eBioscience); anti-NK1.1  
404 (eBioscience); anti-PD-1 (eBioscience) and anti-PD-L1 (eBioscience). The various  
405 hematopoietic progenitor cell compartments of bone marrow were also stained extracellularly

406 for 30 min at room temperature by using different combination of the following antibodies:  
407 anti-Lineage (eBioscience), anti-c-Kit (eBioscience), anti-Sca-1 (eBioscience), anti-CD34  
408 (eBioscience), anti-Flt-3 (eBioscience). All the immuno-stained cells were subsequently  
409 washed with 1% PBS three times and resuspended for FACS analysis and sorting. Small  
410 amounts of the cell samples were run on a FACS Analyzer LSRII-12P (BD Bioscience) to  
411 determine the proportions of different cell preparations. FACS AriaII SORP (BD Bioscience)  
412 was then used to sort the indicated cell populations. The detail gating subsets for all the cell as  
413 described above are shown in Table S1. Data analysis was performed using FlowJo software.

414 The cell population analysis of leukocytes was performed at the Immune Monitoring  
415 Core, TMU. The leukocytes of 3- or 24-month-old WT and *Eklf*(K74R) mice were analyzed  
416 by flow cytometry to determine the populations of CD3<sup>+</sup>-B220<sup>-</sup>-T cells, CD3<sup>-</sup>-B220<sup>+</sup>-B cells,  
417 CD3<sup>-</sup>-NK1.1<sup>+</sup>-NK cells, CD3<sup>+</sup>-B220<sup>-</sup>-CD4<sup>+</sup> helper T cells (Th), CD3<sup>+</sup>-B220<sup>-</sup>-CD8<sup>+</sup> cytotoxic  
418 T cells (Tc), CD3<sup>+</sup>-B220<sup>-</sup>-CD4<sup>+</sup>-INF- $\gamma$ <sup>+</sup> (Th1), and CD3<sup>+</sup>-B220<sup>-</sup>-CD4<sup>+</sup>-IL-4<sup>+</sup> (Th2).

419

#### 420 **RNAi knockdown of *Eklf* mRNA from T cells**

421 CD3<sup>+</sup> T cells isolated by sorting were cultured in RPMI 1640 medium for one day for  
422 recovery and then transfected with EGFP-plasmid (control), scrambled oligonucleotides (SC  
423 control), *Eklf* knockdown oligonucleotide 1 (oligo 1), or *Eklf* knockdown oligonucleotide 2  
424 (oligo 2) in a 96-well plate for 48 h using a LONZA electroporation kit (P3 Primary Cell  
425 4D-Nucleofector<sup>TM</sup> X Kit) and machine (4D-Nucleofector<sup>TM</sup> Core Unit). Then the cells  
426 were lysed using a PureLink<sup>®</sup> RNA Mini kit (Life Technologies) and analyzed by RT-qPCR.

427

#### 428 **RT-qPCR and cell treatment**

429 Total RNA from B cells, T cells, white blood cells (WBC) and total blood from the  
430 peripheral blood of *Eklf*(K74R) and WT mice were extracted using a PureLink<sup>®</sup> RNA Mini  
431 kit (Life Technologies). The RNAs were reverse-transcribed by means of oligo-dT primers,  
432 Maxima H Minus Reverse Transcriptase (Thermo Scientific<sup>TM</sup>) and SYBR Green reagents  
433 (Applied Biosystems). RT-qPCR was performed using a LightCycler<sup>®</sup> Nano machine  
434 (Roche). Gene-specific primers for *Eklf*, *Pd-1*, *Pd-11*, *Pd-12*, and *Gapdh* were designed using  
435 Vector NTI Advance 9 software according to respective mRNA sequences in the NCBI  
436 database (primer sequences are available upon request). Expression levels of mRNAs were  
437 normalized to that of endogenous *Gapdh* mRNA.

438

#### 439 **Western blotting (WB)**

440 We adopted a previously described WB procedure<sup>63</sup>. White blood cells (WBC) of  
441 *Eklf*(K74R) and WT B6 mice were collected from RBC lysis buffer-treated peripheral blood.  
442 The WBC pellets were lysed in sample buffer and run on SDS-PAGE gels. WB with  
443 anti-EKLF (Abcam) and anti-actin (Sigma) antibodies was then used to analyze the levels of  
444 EKLF and actin protein.

445

#### 446 **In vivo bioluminescence imaging**

447 *Eklf*(K74R) and WT B6 mice were physically restrained and  $1 \times 10^5$  B16-F10-luc  
448 cells/mouse were intravenously injected into their tail vein. Ten days after melanoma cell  
449 inoculation, mice were anesthetized for 5 min and injected intraperitoneally with D-luciferin  
450 (300 mg/Kg of body weight). Fifteen minutes after maximum luciferin uptake, the mice were  
451 subjected to imaging of the lung and liver regions in an IVIS 50 Bioluminescence imager  
452 (Caliper Life Sciences) to determine metastatic burden. The same mice were used the next  
453 day as recipients of bone marrow transplantation (BMT) from donor WT or *Eklf*(K74R) mice.  
454 Following BMT, bioluminescence imaging was performed on days 0, 10, 17 and 24.

455

#### 456 **Bone marrow transplantation (BMT)**

457 BMT followed the standard protocol described in Imado *et al.* (2004)<sup>22</sup>. B6, CD45.1 or  
458 CD45.2 donor mice were sacrificed and their femurs were removed. Bone marrow cells were  
459 harvested by flashing the femurs with RPM I1640 medium (GIBCO) using a 27-gauge needle  
460 and syringe. The cells were then incubated at 37 °C for 30 min in murine complement buffer  
461 containing antibodies against B cells, T cells and NK cells, washed twice with PBS, and then  
462 subjected to Ficoll-Paque PLUS gradient centrifugation to collect bone marrow mononuclear  
463 cells (BMMNCs). BMMNCs ( $1 \times 10^6$  cells/mouse) from donor mice were injected into the tail  
464 veins of recipient B6, CD45.2 or CD45.1 mice that had been exposed to total body  
465  $\gamma$ -irradiation of 10, 5 or 2.5 Gy.

466

#### 467 **Bead-based multiplex assay of serum cytokines**

468 Serum samples were obtained via submandibular blood collection and allowed to clot in  
469 uncoated tubes for two hours at room temperature. The tubes were centrifuged at 6,000 rpm  
470 and the supernatants were collected for cytokine analysis by bead-based multiplex assay  
471 (MILLIPLEX MAP Mouse High Sensitivity T Cell Panel, Millipore) following the  
472 manufacturer protocol<sup>25</sup>.

473

474 **Protein extraction**

475 The cell pellets were resuspended in protein extraction buffer (20 mM HEPES, 0.2%  
476 SDS, 1 mM EDTA, 1 mM glycerophosphate, 1 mM Na<sub>3</sub>VO<sub>4</sub>, and 2.5 mM Na<sub>4</sub>P<sub>2</sub>O<sub>7</sub>) with  
477 protease inhibitor cocktail (Sigma-Aldrich) and 1 mM phenylmethylsulfonyl fluoride (PMSF).  
478 The lysates were further homogenized using a Bioruptor (Diagenode) at 4 °C for 15 min, and  
479 then centrifuged at 14,000 × g at 4 °C for 20 min. The supernatant was transferred to a new  
480 tube before determining protein concentration by means of BCA protein assay (Pierce,  
481 Thermo Fisher). Protein aliquots were stored at -30 °C until use.

482

483 **In-solution digestion**

484 Protein solutions were first diluted with 50 mM ammonium bicarbonate (ABC) and  
485 reduced with 5 mM dithiothreitol (DTT, Merck) at 60 °C for 45 min, followed by  
486 cysteine-blocking with 10 mM iodoacetamide (IAM, Sigma) at 25°C for 30 min. The samples  
487 were then diluted with 25 mM ABC and digested with sequencing-grade modified porcine  
488 trypsin (Promega) at 37 °C for 16 h. The peptides were desalted using a homemade C18  
489 microcolumn (SOURCE 15RPC, GE Healthcare) and stored at -30 °C until use.

490

491 **LC-MS/MS analysis**

492 The desalted peptides were diluted in HPLC buffer A (0.1% formic acid in 30%  
493 acetonitrile) and loaded onto a homemade SCX column (0.6 × 5 mm, Luna 5 μm SCX 100 Å,  
494 Phenomenex). The eluted peptides were then trapped in a reverse-phase column (Zorbax  
495 300SB-C18, 0.3 × 5 mm; Agilent Technologies), and separated on a homemade column  
496 (HydroRP 2.5 μm, 75 μm I.D. × 15 cm with a 15 μm tip) using a multi-step gradient of HPLC  
497 buffer B (99.9% acetonitrile/0.1% formic acid) for 90 min with a flow rate of 0.3 μl/min. The  
498 LC apparatus was coupled to a 2D linear ion trap mass spectrometer (Orbitrap Elite ETD;  
499 Thermo Fisher) operated using Xcalibur 2.2 software (Thermo Fisher). Full-scan MS was  
500 performed in the Orbitrap over a range of 400 to 2,000 Da and a resolution of 120,000 at m/z  
501 400. Internal calibration was performed using the ion signal of [Si(CH<sub>3</sub>)<sub>2</sub>O]<sub>6</sub>H<sup>+</sup> at m/z  
502 536.165365 as lock mass. The 20 data-dependent MS/MS scan events were followed by one  
503 MS scan for the 20 most abundant precursor ions in the preview MS scan. The m/z values  
504 selected for MS/MS were dynamically excluded for 40 sec with a relative mass window of 10  
505 ppm. The electrospray voltage was set to 2.0 kV, and the temperature of the capillary was set  
506 to 200 °C. MS and MS/MS automatic gain control was set to 1,000 ms (full scan) and 200 ms

507 (MS/MS), or to  $3 \times 10^6$  ions (full scan) and 3,000 ions (MS/MS), for maximum accumulated  
508 time or ions, respectively.

509

### 510 **Protein identification**

511 Data analysis was carried out using Proteome Discoverer software (version 1.4, Thermo  
512 Fisher Scientific). The MS/MS spectra were searched against the SwissProt database using  
513 the Mascot search engine (Matrix Science, version 2.5). For peptide identification, 10 ppm  
514 mass tolerance was permitted for intact peptide masses, and 0.5 Da for CID fragment ions  
515 with an allowance for two missed cleavages arising from trypsin digestion, oxidized  
516 methionine and acetyl (protein N-terminal) as variable modifications, and carbamidomethyl  
517 (cysteine) as a static modification. Peptide spectrum matches (PSM) were then filtered based  
518 on high confidence and a Mascot search engine ranking of 1 for peptide identification to  
519 ensure an overall false discovery rate  $<0.01$ . Proteins with single peptide hits were removed  
520 from further analysis.

521

### 522 **Gene Set Enrichment Analysis**

523 The absolute abundance of each peptide was calculated from respective peak intensity  
524 based on the PSM abundance. The protein abundance of each sample was calculated from the  
525 sum of the peptide abundance. The abundance data were then background-corrected and  
526 normalized according to variance stabilizing transformation by using the function  
527 “normalize\_vsn” in the R package *DEP*<sup>64</sup>. Differential expression across groups was  
528 determined using the function “test\_diff” based on protein-wise linear models combined with  
529 empirical Bayes statistics. Significantly differentially-expressed proteins were determined  
530 according to a P-value threshold of 0.01 and a fold-change (FC)  $>1.5$ . To establish functional  
531 pathways enriched across groups, normalized data for each pair of compared groups were  
532 used to perform Gene Set Enrichment Analysis (GSEA v4.2.0)<sup>65</sup> on selected MSigDB gene  
533 sets, including Hallmark (H), curated (C2), and immunologic signature (C7) gene sets, by  
534 using the default parameters. Normalized enrichment scores (NES) were used to plot a  
535 heatmap in the R package *pheatmap* (v1.0.12).

536

### 537 **Statistical analysis**

538 Data are shown as mean  $\pm$  standard deviation (SD) or standard error of the mean (SEM).  
539 Comparisons of data under different experimental conditions were carried out using  
540 GraphPad Prism 6.0 software (GraphPad). Each error bar represents SEM unless otherwise



541 indicated. Significant differences in tumor growth on mouse lungs were assessed by Student's  
542 t test. A difference between groups was considered statistically significant when the p value  
543 was lower than 0.05.

544

545

546

547

548

549

550

551

## 552 **References**

553 1. Aman Y, Schmauck-Medina T, Hansen M, et al. Autophagy in healthy aging and  
554 disease. *Nat Aging*. Aug 2021;1(8):634-650. doi:10.1038/s43587-021-00098-4

555 2. López-Otín C, Blasco MA, Partridge L, Serrano M, Kroemer G. The hallmarks  
556 of aging. *Cell*. Jun 6 2013;153(6):1194-217. doi:10.1016/j.cell.2013.05.039

557 3. Bashor CJ, Hilton IB, Bandukwala H, Smith DM, Veiseh O. Engineering the  
558 next generation of cell-based therapeutics. *Nat Rev Drug Discov*. Sep  
559 2022;21(9):655-675. doi:10.1038/s41573-022-00476-6

560 4. Fontana L, Partridge L. Promoting health and longevity through diet: from model  
561 organisms to humans. *Cell*. Mar 26 2015;161(1):106-118.  
562 doi:10.1016/j.cell.2015.02.020

563 5. Longo VD, Anderson RM. Nutrition, longevity and disease: From molecular  
564 mechanisms to interventions. *Cell*. Apr 28 2022;185(9):1455-1470.  
565 doi:10.1016/j.cell.2022.04.002

566 6. Mitchell E, Spencer Chapman M, Williams N, et al. Clonal dynamics of  
567 haematopoiesis across the human lifespan. *Nature*. Jun 2022;606(7913):343-350.  
568 doi:10.1038/s41586-022-04786-y

569 7. Pálovics R, Keller A, Schaum N, et al. Molecular hallmarks of heterochronic  
570 parabiosis at single-cell resolution. *Nature*. Mar 2022;603(7900):309-314.  
571 doi:10.1038/s41586-022-04461-2

- 572 8. Seita J, Weissman IL. Hematopoietic stem cell: self-renewal versus  
573 differentiation. *Wiley Interdiscip Rev Syst Biol Med*. Nov-Dec 2010;2(6):640-53.  
574 doi:10.1002/wsbm.86
- 575 9. Montazersaheb S, Ehsani A, Fathi E, Farahzadi R. Cellular and Molecular  
576 Mechanisms Involved in Hematopoietic Stem Cell Aging as a Clinical Prospect. *Oxid*  
577 *Med Cell Longev*. 2022;2022:2713483. doi:10.1155/2022/2713483
- 578 10. Frontelo P, Manwani D, Galdass M, et al. Novel role for EKLF in  
579 megakaryocyte lineage commitment. *Blood*. Dec 1 2007;110(12):3871-80.  
580 doi:10.1182/blood-2007-03-082065
- 581 11. Nishizawa M, Chonabayashi K, Nomura M, et al. Epigenetic Variation between  
582 Human Induced Pluripotent Stem Cell Lines Is an Indicator of Differentiation  
583 Capacity. *Cell Stem Cell*. Sep 1 2016;19(3):341-54. doi:10.1016/j.stem.2016.06.019
- 584 12. Teruya S, Okamura T, Komai T, et al. Egr2-independent, Klf1-mediated  
585 induction of PD-L1 in CD4(+) T cells. *Sci Rep*. May 4 2018;8(1):7021.  
586 doi:10.1038/s41598-018-25302-1
- 587 13. Perkins A, Xu X, Higgs DR, et al. Krüppeling erythropoiesis: an unexpected  
588 broad spectrum of human red blood cell disorders due to KLF1 variants. *Blood*. Apr  
589 14 2016;127(15):1856-62. doi:10.1182/blood-2016-01-694331
- 590 14. Neuwirtova R, Fuchs O, Holicka M, et al. Transcription factors Fli1 and EKLF  
591 in the differentiation of megakaryocytic and erythroid progenitor in 5q- syndrome and  
592 in Diamond-Blackfan anemia. *Ann Hematol*. Jan 2013;92(1):11-8.  
593 doi:10.1007/s00277-012-1568-1
- 594 15. Luo Q, Ma X, Wahl SM, Bieker JJ, Crossley M, Montaner LJ. Activation and  
595 repression of interleukin-12 p40 transcription by erythroid Kruppel-like factor in  
596 macrophages. *J Biol Chem*. Apr 30 2004;279(18):18451-6.  
597 doi:10.1074/jbc.M400320200
- 598 16. Hung CH, Wang KY, Liou YH, et al. Negative Regulation of the Differentiation  
599 of Flk2(-) CD34(-) LSK Hematopoietic Stem Cells by EKLF/KLF1. *Int J Mol Sci*.  
600 Nov 10 2020;21(22)doi:10.3390/ijms21228448
- 601 17. Siatecka M, Bieker JJ. The multifunctional role of EKLF/KLF1 during  
602 erythropoiesis. *Blood*. Aug 25 2011;118(8):2044-54.  
603 doi:10.1182/blood-2011-03-331371
- 604 18. Pilon AM, Ajay SS, Kumar SA, et al. Genome-wide ChIP-Seq reveals a  
605 dramatic shift in the binding of the transcription factor erythroid Kruppel-like factor

- 606 during erythrocyte differentiation. *Blood*. Oct 27 2011;118(17):e139-48.  
607 doi:10.1182/blood-2011-05-355107
- 608 19. Tallack MR, Magor GW, Dartigues B, et al. Novel roles for KLF1 in  
609 erythropoiesis revealed by mRNA-seq. *Genome Res*. Dec 2012;22(12):2385-98.  
610 doi:10.1101/gr.135707.111
- 611 20. Shyu YC, Lee TL, Chen X, et al. Tight regulation of a timed nuclear import  
612 wave of EKLF by PKC $\theta$  and FOE during Pro-E to Baso-E transition. *Dev Cell*. Feb  
613 24 2014;28(4):409-22. doi:10.1016/j.devcel.2014.01.007
- 614 21. Shyu YC, Liao PC, Huang TS, et al. Genetic Disruption of KLF1 K74  
615 SUMOylation in Hematopoietic System Promotes Healthy Longevity in Mice. *Adv  
616 Sci (Weinh)*. Sep 2022;9(25):e2201409. doi:10.1002/advs.202201409
- 617 22. Imado T, Iwasaki T, Kataoka Y, et al. Hepatocyte growth factor preserves  
618 graft-versus-leukemia effect and T-cell reconstitution after marrow transplantation.  
619 *Blood*. Sep 1 2004;104(5):1542-9. doi:10.1182/blood-2003-12-4309
- 620 23. Iwai Y, Hamanishi J, Chamoto K, Honjo T. Cancer immunotherapies targeting  
621 the PD-1 signaling pathway. *J Biomed Sci*. Apr 4 2017;24(1):26.  
622 doi:10.1186/s12929-017-0329-9
- 623 24. Jiang X, Wang J, Deng X, et al. Role of the tumor microenvironment in  
624 PD-L1/PD-1-mediated tumor immune escape. *Mol Cancer*. Jan 15 2019;18(1):10.  
625 doi:10.1186/s12943-018-0928-4
- 626 25. Aira C, Ruiz T, Dixon L, Blome S, Rueda P, Sastre P. Bead-Based Multiplex  
627 Assay for the Simultaneous Detection of Antibodies to African Swine Fever Virus  
628 and Classical Swine Fever Virus. *Front Vet Sci*. 2019;6:306.  
629 doi:10.3389/fvets.2019.00306
- 630 26. Menees KB, Earls RH, Chung J, et al. Sex- and age-dependent alterations of  
631 splenic immune cell profile and NK cell phenotypes and function in C57BL/6J mice.  
632 *Immun Ageing*. Jan 8 2021;18(1):3. doi:10.1186/s12979-021-00214-3
- 633 27. Ul-Haq Z, Naz S, Mosaik MA. Interleukin-4 receptor signaling and its binding  
634 mechanism: A therapeutic insight from inhibitors tool box. *Cytokine Growth Factor  
635 Rev*. Dec 2016;32:3-15. doi:10.1016/j.cytogfr.2016.04.002
- 636 28. Boccardi V, Westman E, Pelini L, et al. Differential Associations of IL-4 With  
637 Hippocampal Subfields in Mild Cognitive Impairment and Alzheimer's Disease.  
638 *Front Aging Neurosci*. 2018;10:439. doi:10.3389/fnagi.2018.00439

- 639 29. Rea IM, Gibson DS, McGilligan V, McNerlan SE, Alexander HD, Ross OA.  
640 Age and Age-Related Diseases: Role of Inflammation Triggers and Cytokines. *Front*  
641 *Immunol.* 2018;9:586. doi:10.3389/fimmu.2018.00586
- 642 30. Fabian DK, Fuentealba M, Dönertaş HM, Partridge L, Thornton JM. Functional  
643 conservation in genes and pathways linking ageing and immunity. *Immun Ageing.*  
644 May 14 2021;18(1):23. doi:10.1186/s12979-021-00232-1
- 645 31. Yeo EJ. Hypoxia and aging. *Exp Mol Med.* Jun 20 2019;51(6):1-15.  
646 doi:10.1038/s12276-019-0233-3
- 647 32. Zhu X, Chen Z, Shen W, et al. Inflammation, epigenetics, and metabolism  
648 converge to cell senescence and ageing: the regulation and intervention. *Signal*  
649 *Transduct Target Ther.* Jun 28 2021;6(1):245. doi:10.1038/s41392-021-00646-9
- 650 33. Hamarshah S, Groß O, Brummer T, Zeiser R. Immune modulatory effects of  
651 oncogenic KRAS in cancer. *Nat Commun.* Oct 28 2020;11(1):5439.  
652 doi:10.1038/s41467-020-19288-6
- 653 34. Ni L, Lu J. Interferon gamma in cancer immunotherapy. *Cancer Med.* Sep  
654 2018;7(9):4509-4516. doi:10.1002/cam4.1700
- 655 35. Principe DR, Doll JA, Bauer J, et al. TGF- $\beta$ : duality of function between tumor  
656 prevention and carcinogenesis. *J Natl Cancer Inst.* Feb 2014;106(2):djt369.  
657 doi:10.1093/jnci/djt369
- 658 36. Zitvogel L, Galluzzi L, Kepp O, Smyth MJ, Kroemer G. Type I interferons in  
659 anticancer immunity. *Nat Rev Immunol.* Jul 2015;15(7):405-14. doi:10.1038/nri3845
- 660 37. Zhao G, Zhu G, Huang Y, et al. IL-6 mediates the signal pathway of  
661 JAK-STAT3-VEGF-C promoting growth, invasion and lymphangiogenesis in gastric  
662 cancer. *Oncol Rep.* Mar 2016;35(3):1787-95. doi:10.3892/or.2016.4544
- 663 38. Bin-Jumah MN, Nadeem MS, Gilani SJ, et al. Genes and Longevity of Lifespan.  
664 *Int J Mol Sci.* Jan 28 2022;23(3)doi:10.3390/ijms23031499
- 665 39. Hofmann JW, Zhao X, De Cecco M, et al. Reduced expression of MYC  
666 increases longevity and enhances healthspan. *Cell.* Jan 29 2015;160(3):477-88.  
667 doi:10.1016/j.cell.2014.12.016
- 668 40. Ocampo A, Reddy P, Martinez-Redondo P, et al. In Vivo Amelioration of  
669 Age-Associated Hallmarks by Partial Reprogramming. *Cell.* Dec 15  
670 2016;167(7):1719-1733.e12. doi:10.1016/j.cell.2016.11.052

- 671 41. Varady KA, Cienfuegos S, Ezpeleta M, Gabel K. Clinical application of  
672 intermittent fasting for weight loss: progress and future directions. *Nat Rev*  
673 *Endocrinol.* May 2022;18(5):309-321. doi:10.1038/s41574-022-00638-x
- 674 42. Hifumi T, Yamamoto A, Ato M, et al. Clinical Serum Therapy: Benefits,  
675 Cautions, and Potential Applications. *Keio J Med.* Dec 25 2017;66(4):57-64.  
676 doi:10.2302/kjm.2016-0017-IR
- 677 43. Morgan RA, Gray D, Lomova A, Kohn DB. Hematopoietic Stem Cell Gene  
678 Therapy: Progress and Lessons Learned. *Cell Stem Cell.* Nov 2 2017;21(5):574-590.  
679 doi:10.1016/j.stem.2017.10.010
- 680 44. Giannaccare G, Carnevali A, Senni C, Logozzo L, Scordia V. Umbilical Cord  
681 Blood and Serum for the Treatment of Ocular Diseases: A Comprehensive Review.  
682 *Ophthalmol Ther.* Jun 2020;9(2):235-248. doi:10.1007/s40123-020-00239-9
- 683 45. Wu SY, Fu T, Jiang YZ, Shao ZM. Natural killer cells in cancer biology and  
684 therapy. *Mol Cancer.* Aug 6 2020;19(1):120. doi:10.1186/s12943-020-01238-x
- 685 46. Daver N, Wei AH, Pollyea DA, Fathi AT, Vyas P, DiNardo CD. New directions  
686 for emerging therapies in acute myeloid leukemia: the next chapter. *Blood Cancer J.*  
687 Oct 30 2020;10(10):107. doi:10.1038/s41408-020-00376-1
- 688 47. Mora J. Autologous Stem-Cell Transplantation for High-Risk Neuroblastoma:  
689 Historical and Critical Review. *Cancers (Basel).* May 24  
690 2022;14(11)doi:10.3390/cancers14112572
- 691 48. Conboy IM, Conboy MJ, Wagers AJ, Girma ER, Weissman IL, Rando TA.  
692 Rejuvenation of aged progenitor cells by exposure to a young systemic environment.  
693 *Nature.* Feb 17 2005;433(7027):760-4. doi:10.1038/nature03260
- 694 49. Das MM, Godoy M, Chen S, et al. Young bone marrow transplantation preserves  
695 learning and memory in old mice. *Commun Biol.* 2019;2:73.  
696 doi:10.1038/s42003-019-0298-5
- 697 50. Goodell MA, Rando TA. Stem cells and healthy aging. *Science.* Dec 4  
698 2015;350(6265):1199-204. doi:10.1126/science.aab3388
- 699 51. Kang S, Moser VA, Svendsen CN, Goodridge HS. Rejuvenating the blood and  
700 bone marrow to slow aging-associated cognitive decline and Alzheimer's disease.  
701 *Commun Biol.* Feb 13 2020;3(1):69. doi:10.1038/s42003-020-0797-4
- 702 52. Castellano JM, Mosher KI, Abbey RJ, et al. Human umbilical cord plasma  
703 proteins revitalize hippocampal function in aged mice. *Nature.* Apr 27  
704 2017;544(7651):488-492. doi:10.1038/nature22067

- 705 53. Mehdipour M, Skinner C, Wong N, et al. Rejuvenation of three germ layers  
706 tissues by exchanging old blood plasma with saline-albumin. *Aging (Albany NY)*. May  
707 30 2020;12(10):8790-8819. doi:10.18632/aging.103418
- 708 54. Siatecka M, Xue L, Bieker JJ. Sumoylation of EKLF promotes transcriptional  
709 repression and is involved in inhibition of megakaryopoiesis. *Mol Cell Biol*. Dec  
710 2007;27(24):8547-60. doi:10.1128/mcb.00589-07
- 711 55. Aunan JR, Cho WC, Søreide K. The Biology of Aging and Cancer: A Brief  
712 Overview of Shared and Divergent Molecular Hallmarks. *Aging Dis*. Oct  
713 2017;8(5):628-642. doi:10.14336/ad.2017.0103
- 714 56. Lages CS, Lewkowich I, Sproles A, Wills-Karp M, Chougnet C. Partial  
715 restoration of T-cell function in aged mice by in vitro blockade of the PD-1/PD-L1  
716 pathway. *Aging Cell*. Oct 2010;9(5):785-98. doi:10.1111/j.1474-9726.2010.00611.x
- 717 57. Schaum N, Lehallier B, Hahn O, et al. Ageing hallmarks exhibit organ-specific  
718 temporal signatures. *Nature*. Jul 2020;583(7817):596-602.  
719 doi:10.1038/s41586-020-2499-y
- 720 58. Aira C, Ruiz T, Dixon L, Blome S, Rueda P, Sastre P. Bead-Based Multiplex  
721 Assay for the Simultaneous Detection of Antibodies to African Swine Fever Virus  
722 and Classical Swine Fever Virus. Original Research. *Frontiers in Veterinary Science*.  
723 2019-September-13 2019;6doi:10.3389/fvets.2019.00306
- 724 59. Zhou J, Zhu Z, Bai C, Sun H, Wang X. Proteomic profiling of lymphocytes in  
725 autoimmunity, inflammation and cancer. *J Transl Med*. Jan 7 2014;12:6.  
726 doi:10.1186/1479-5876-12-6
- 727 60. Zhang D, Chen G, Manwani D, et al. Neutrophil ageing is regulated by the  
728 microbiome. *Nature*. Sep 24 2015;525(7570):528-32. doi:10.1038/nature15367
- 729 61. Tsai CH, Tzeng SF, Chao TK, et al. Metastatic Progression of Prostate Cancer Is  
730 Mediated by Autonomous Binding of Galectin-4-O-Glycan to Cancer Cells. *Cancer*  
731 *Res*. Oct 1 2016;76(19):5756-5767. doi:10.1158/0008-5472.Can-16-0641
- 732 62. Narasimhan PB, Eggert T, Zhu YP, et al. Patrolling Monocytes Control NK Cell  
733 Expression of Activating and Stimulatory Receptors to Curtail Lung Metastases. *J*  
734 *Immunol*. Jan 1 2020;204(1):192-198. doi:10.4049/jimmunol.1900998
- 735 63. Green MR, Sambrook J. *Molecular Cloning: A Laboratory Manual*. Cold Spring  
736 Harbor Laboratory Press; 2012.

- 737 64. Zhang X, Smits AH, van Tilburg GB, Ovaa H, Huber W, Vermeulen M.  
738 Proteome-wide identification of ubiquitin interactions using UbIA-MS. *Nat Protoc.*  
739 Mar 2018;13(3):530-550. doi:10.1038/nprot.2017.147  
740 65. Subramanian A, Tamayo P, Mootha VK, et al. Gene set enrichment analysis: a  
741 knowledge-based approach for interpreting genome-wide expression profiles. *Proc*  
742 *Natl Acad Sci U S A.* Oct 25 2005;102(43):15545-50. doi:10.1073/pnas.0506580102

743

744

745

746

747

748

749

750

751 **Figure Legends**

752

753 **Figure 1. Anti-cancer capability of *Eklf(K74R)* mice as analyzed by the experimental**  
754 **melanoma metastasis assay.**

755 (A) Flow chart illustrating the strategy of the pulmonary tumor foci assay. Left panels,  
756 representative photographs of pulmonary metastatic foci on the lungs of WT and  
757 *Eklf(K74R)* male mice in the B6 background two weeks after intravenous injection of  
758 B16-F10 cells ( $10^5$  cells/ mouse). Statistical comparison of the numbers of pulmonary  
759 foci is shown in the two histograms on the right. N=10 (male) and N=7 (female), \*\*,  
760  $p<0.01$ . Note that only the numbers of large pulmonary foci (>1mm diameter) were  
761 scored. N>6, \*\*,  $p<0.01$ . (B) Pulmonary tumor foci assay of 24-month-old WT and  
762 *Eklf(K74R)* male mice. Statistical comparison is shown in the two histograms. N=10

763 (male), \*,  $p < 0.05$ . (C) Pulmonary tumor foci assay of male mice in the FVB  
764 background. Statistical comparison is shown in the histogram on the right.  $N=10$ , \*\*,  
765  $p < 0.01$ . (D) Pulmonary tumor foci assay of *Eklf*(K74A) male mice. Statistical  
766 comparison of the 3-month-old WT and *Eklf*(K74A) mice numbers of pulmonary foci  
767 is shown in the two histograms.  $N=10$  (male), \*\*,  $p < 0.01$ .

768

769 **Figure 2. Transfer of cancer resistance of *Eklf*(K74R) mice to WT mice by bone marrow**  
770 **transplantation (BMT)**

771 (A) Flow chart illustrating the experimental strategy. (B) FACS analysis of the  
772 efficiency of BMT with use of 10Gy  $\gamma$ -irradiation. The percentages of CD45.1/CD45.2  
773 cells in the PB of the recipient male mice were analyzed by flow cytometry, with the  
774 representative FACS charts shown on the left and the statistical histogram on the  
775 right. (C) Transfer of the anti-metastasis capability of 8-week-old *Eklf*(K74R) male  
776 mice to age-equivalent WT male mice by BMT with use of 10Gy  $\gamma$ -irradiation. Left  
777 panels, representative photographs of lungs with pulmonary metastatic foci in the  
778 recipient WT (CD45.1) mice after BMT from WT (CD45.2) or *Eklf*(K74R) (CD45.2)  
779 donor mice and challenged with B16-F10 cells. Statistical analysis of the numbers of  
780 pulmonary B16-F10 metastatic foci on the lungs is shown in the right histogram.  $n=10$ ,  
781 \*,  $p < 0.05$ . (D) Transplantation of 8-week-old male WT (CD45.1) mice with BMMNC  
782 from age-equivalent WT (CD45.2) male mice or from *Eklf*(K74R) (CD45.2) male mice  
783 with use of the  $\gamma$ -irradiation dosage 2.5Gy or 5Gy. The histogram comparing the  
784 percentages of CD45.1 and CD45.2 PB cells of the recipient WT mice after BMT is  
785 shown on the left. The statistical analysis of the average numbers of pulmonary foci on  
786 the lungs of recipient WT mice after BMT and injected with the B16-F10 cells is  
787 shown in the right histogram,  $N=6$ . \*\*,  $p < 0.01$ , \*\*\*,  $p < 0.001$ .

788

789 **Figure 3. Inhibition of tumor growth in WT mice by BMT from *Eklf*(K74R) mice**

790 (A) A flow chart of the experiments. Luciferase-positive B16-F10 cells were injected  
791 into the tail vein of 8-week-old WT male mice (day 0). The mice were then  
792 transplanted with BMMNC from WT or *Eklf*(K74R) male mice on day 11 after the  
793 luciferase-positive B16-F10 cell injection. *In vivo* imaging system (IVIS) was used to  
794 follow the tumor growth in mice on day 0, 10, 17 and 24, respectively. (B)  
795 Representative images of bioluminescence reflecting the luciferase activity from  
796 melanoma cancer cells in mice. The color bar indicates the scale of the



797 bioluminescence intensity. (C) Statistical analysis of the intensities of bioluminescence  
798 in the cancer-bearing mice (WT→WT, purple, N=7; *Eklf*(K74R)→WT, blue, N=8;  
799 Control (no BMT), red, N=3).

800

801 **Figure 4. Decrease of *Pd-1* and *Pd-11* expression in blood cells of *Eklf*(K74R) mice**

802 (A) Levels of *Pd-1* and *Pd-11* mRNAs in the PB of WT and *Eklf*(K74R) male mice at  
803 the ages of 3 months and 24 months, respectively, as analyzed by RT-qPCR. Note the  
804 relatively low levels of *Pd-1* and *Pd-11* mRNAs in the *Eklf*(K74R) mice at both ages in  
805 comparison to the WT mice. (B) Upper panels, comparison of the mRNA levels of  
806 *Pd-1* and *Pd-11* of CD3<sup>+</sup> T cells and B220<sup>+</sup> B cells isolated from the PB of 8-week-old  
807 WT and *Eklf*(K74R) male mice. N=5. \*, p<0.05; \*\*, p<0.01. Lower panels, comparison  
808 of the protein levels of PD-1 and PD-L1, as analyzed by flow cytometry, of CD3<sup>+</sup> T  
809 cells and B220<sup>+</sup> B cells from 8-week-old WT and *Eklf*(K74R) male mice. N=3. \*,  
810 p<0.05; \*\*, p<0.01. (C) Comparison of the levels of *Pd-1*, *Pd-11* and *Eklf* mRNAs, as  
811 analyzed by RT-qPCR, in CD3<sup>+</sup> T cells, which were isolated from splenocytes, without  
812 or with RNAi knockdown of *Eklf* mRNA. Two oligos (oligo-1 and oligo-2) were used  
813 to knockdown *Eklf* mRNA by ~60-70%, which resulted in the reduction of *Pd-1*  
814 mRNA level by 30-60% and nearly complete depletion of *Pd-11* mRNA. Control, T  
815 cells transfected with GFP-plasmid. SC, T cells transfected with scrambled oligos. N>3.  
816 \*, p<0.05; \*\*, p<0.01; \*\*\*, p<0.001.

817

818

(A)

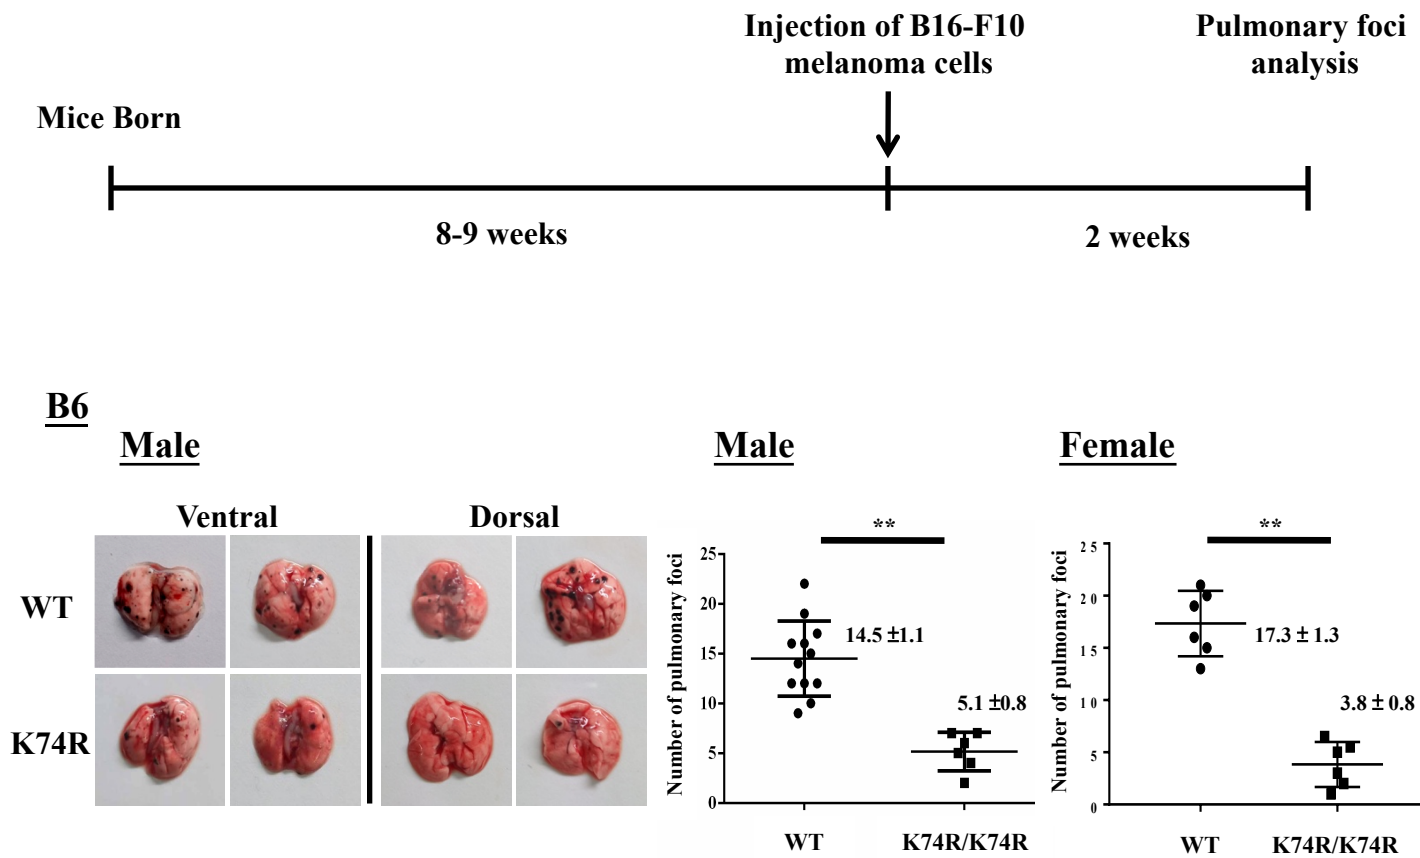

(B)

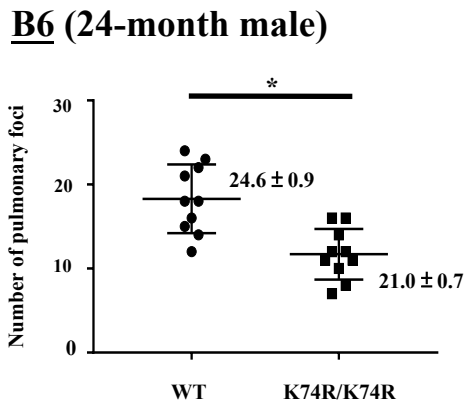

(C)

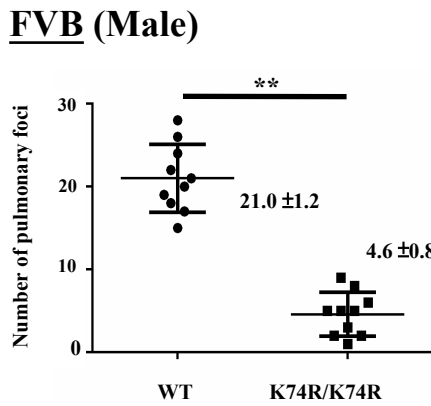

(D)

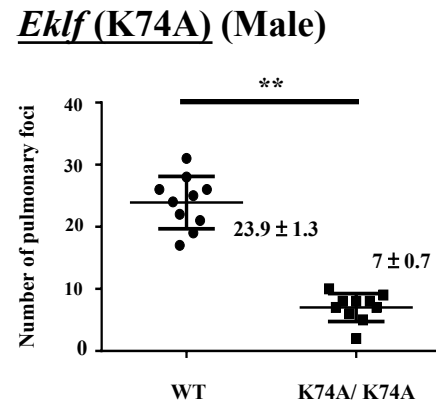

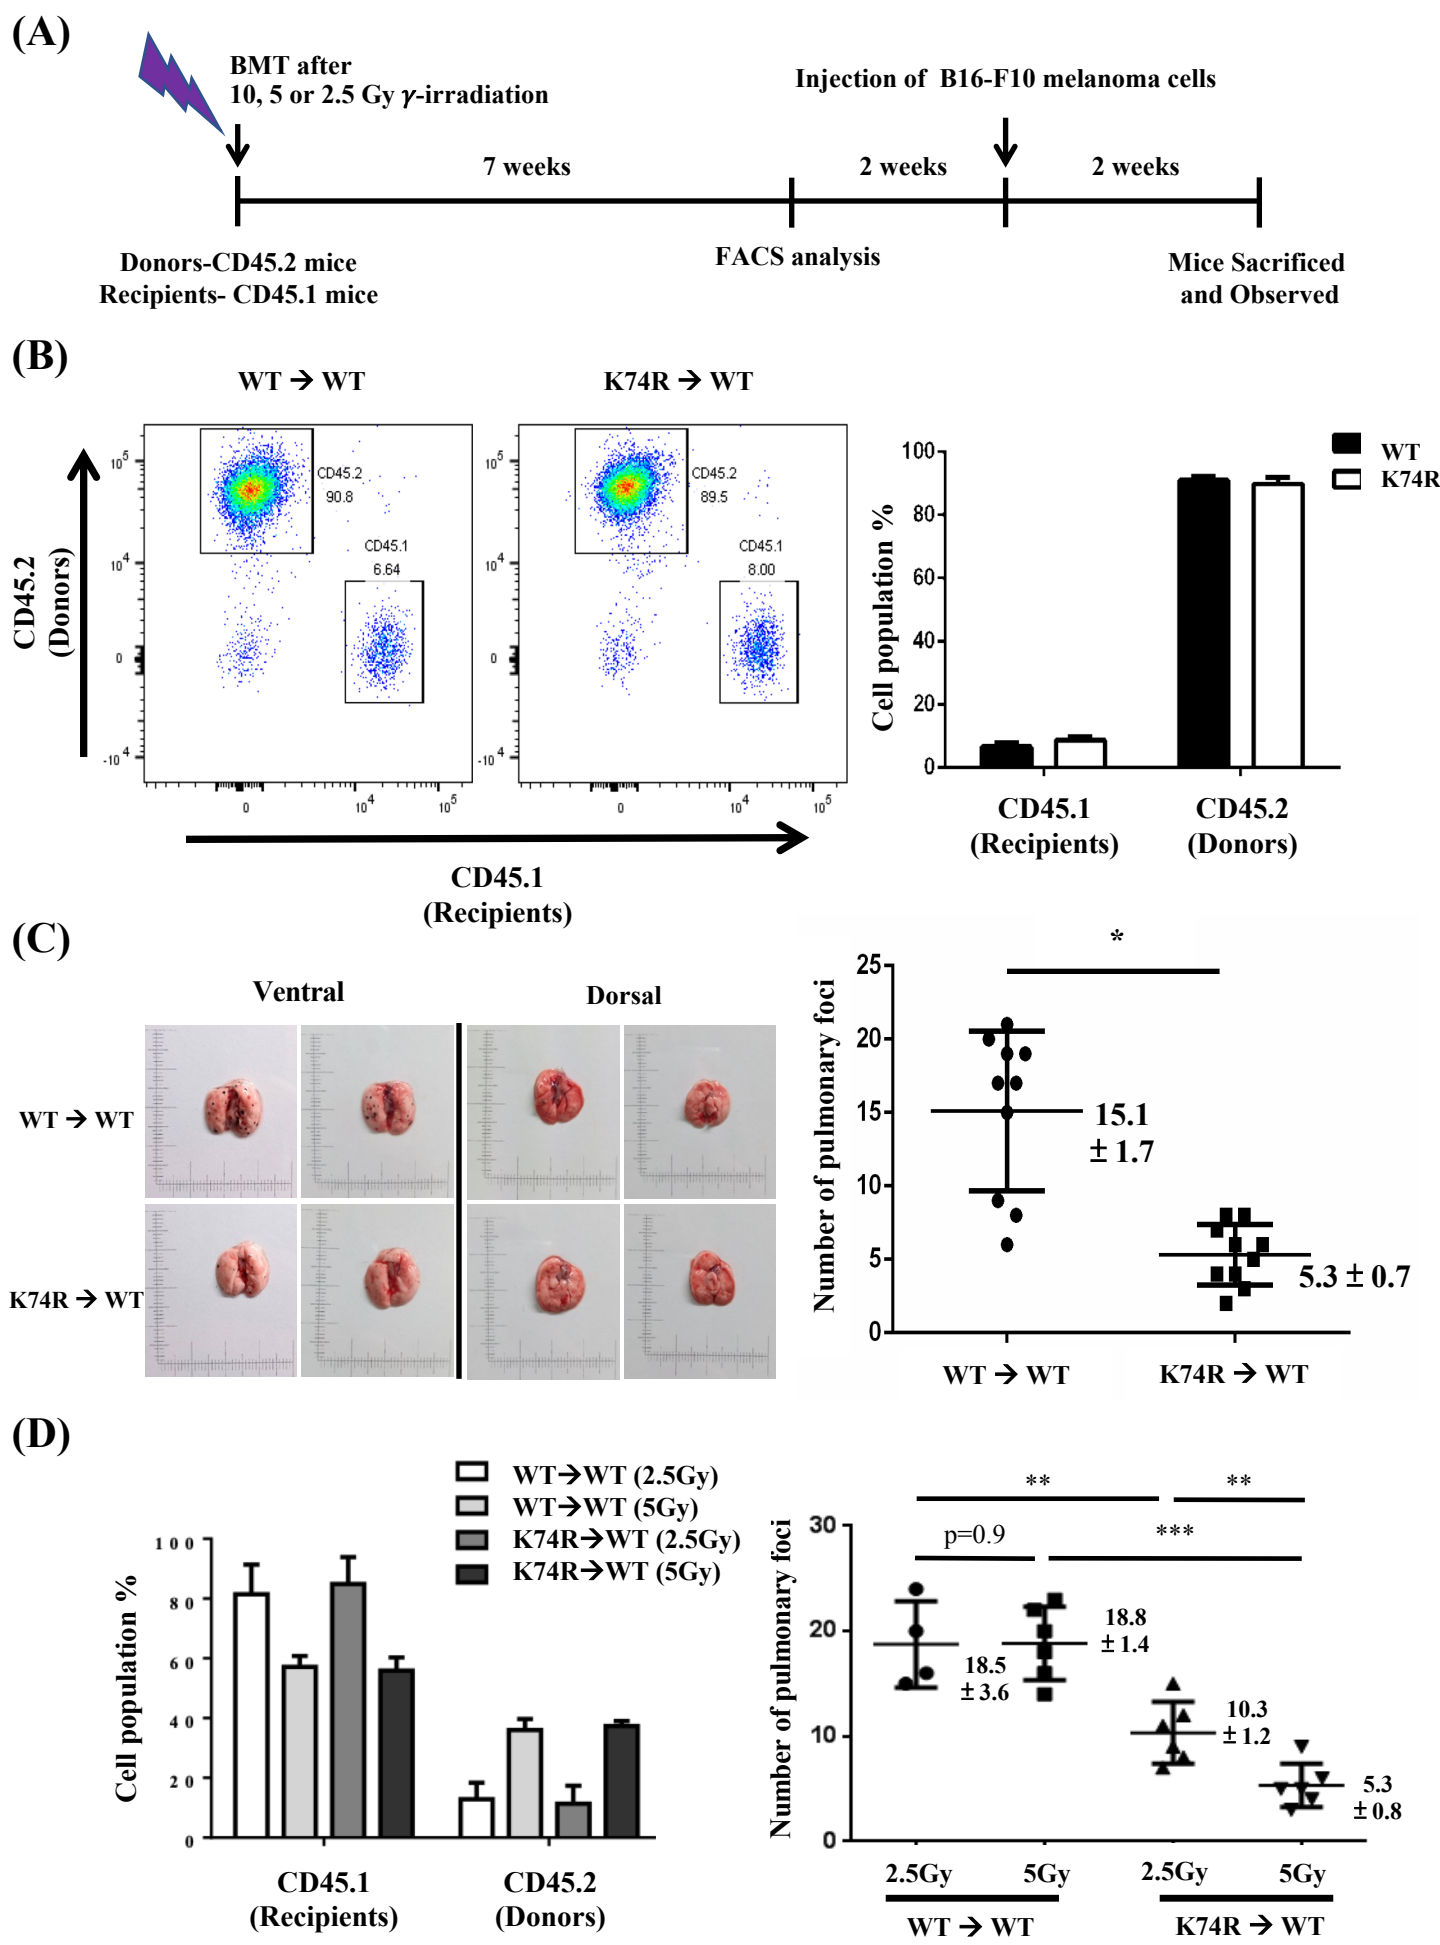

(A)

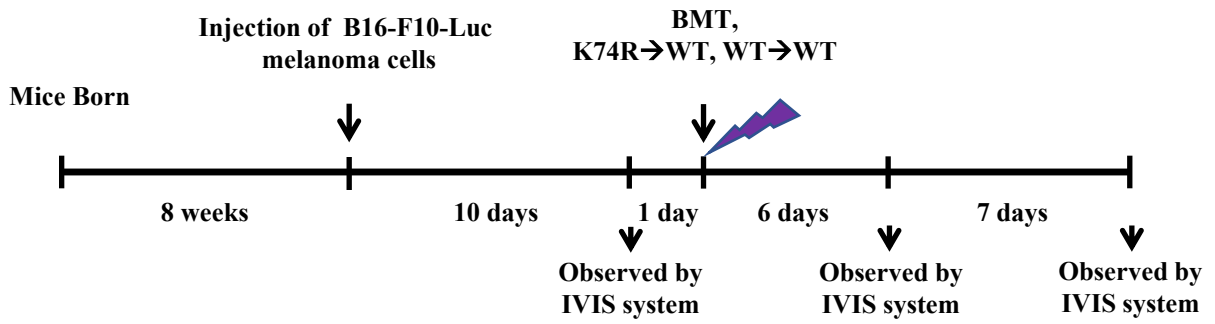

(B)

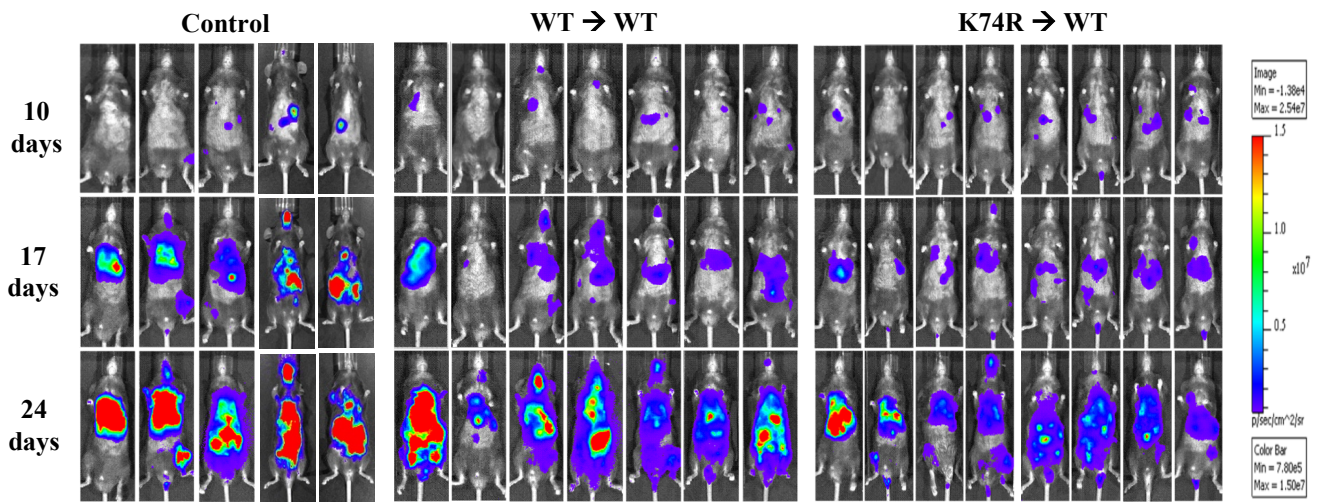

(C)

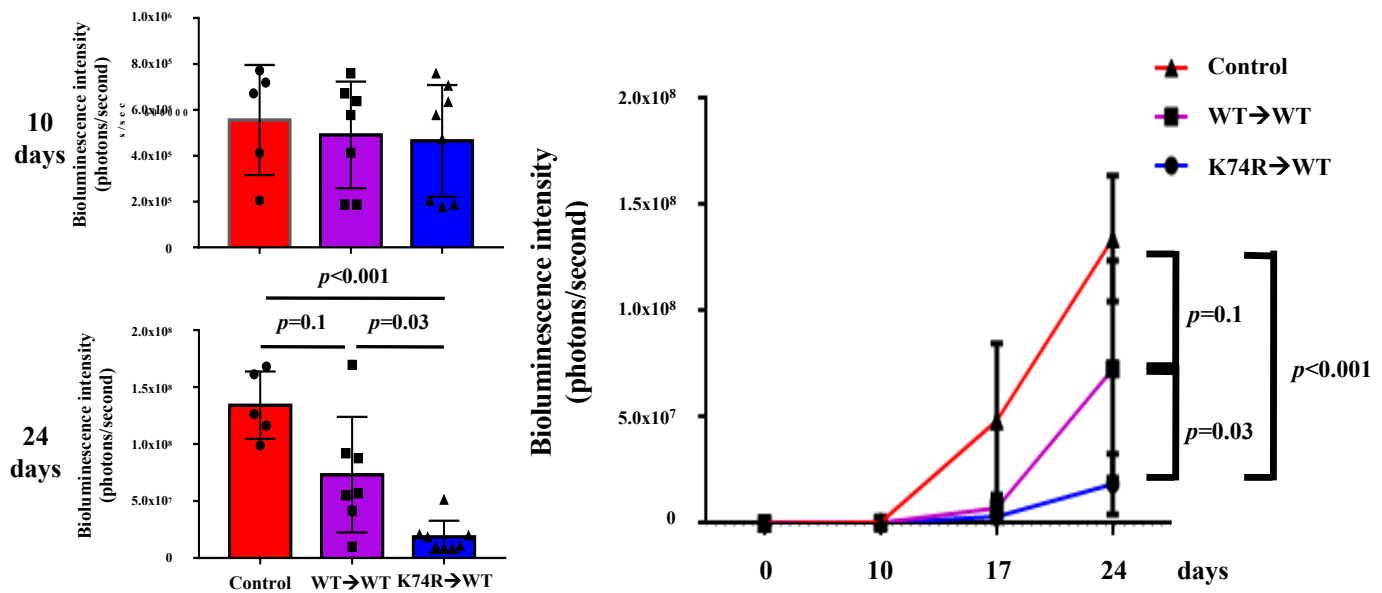

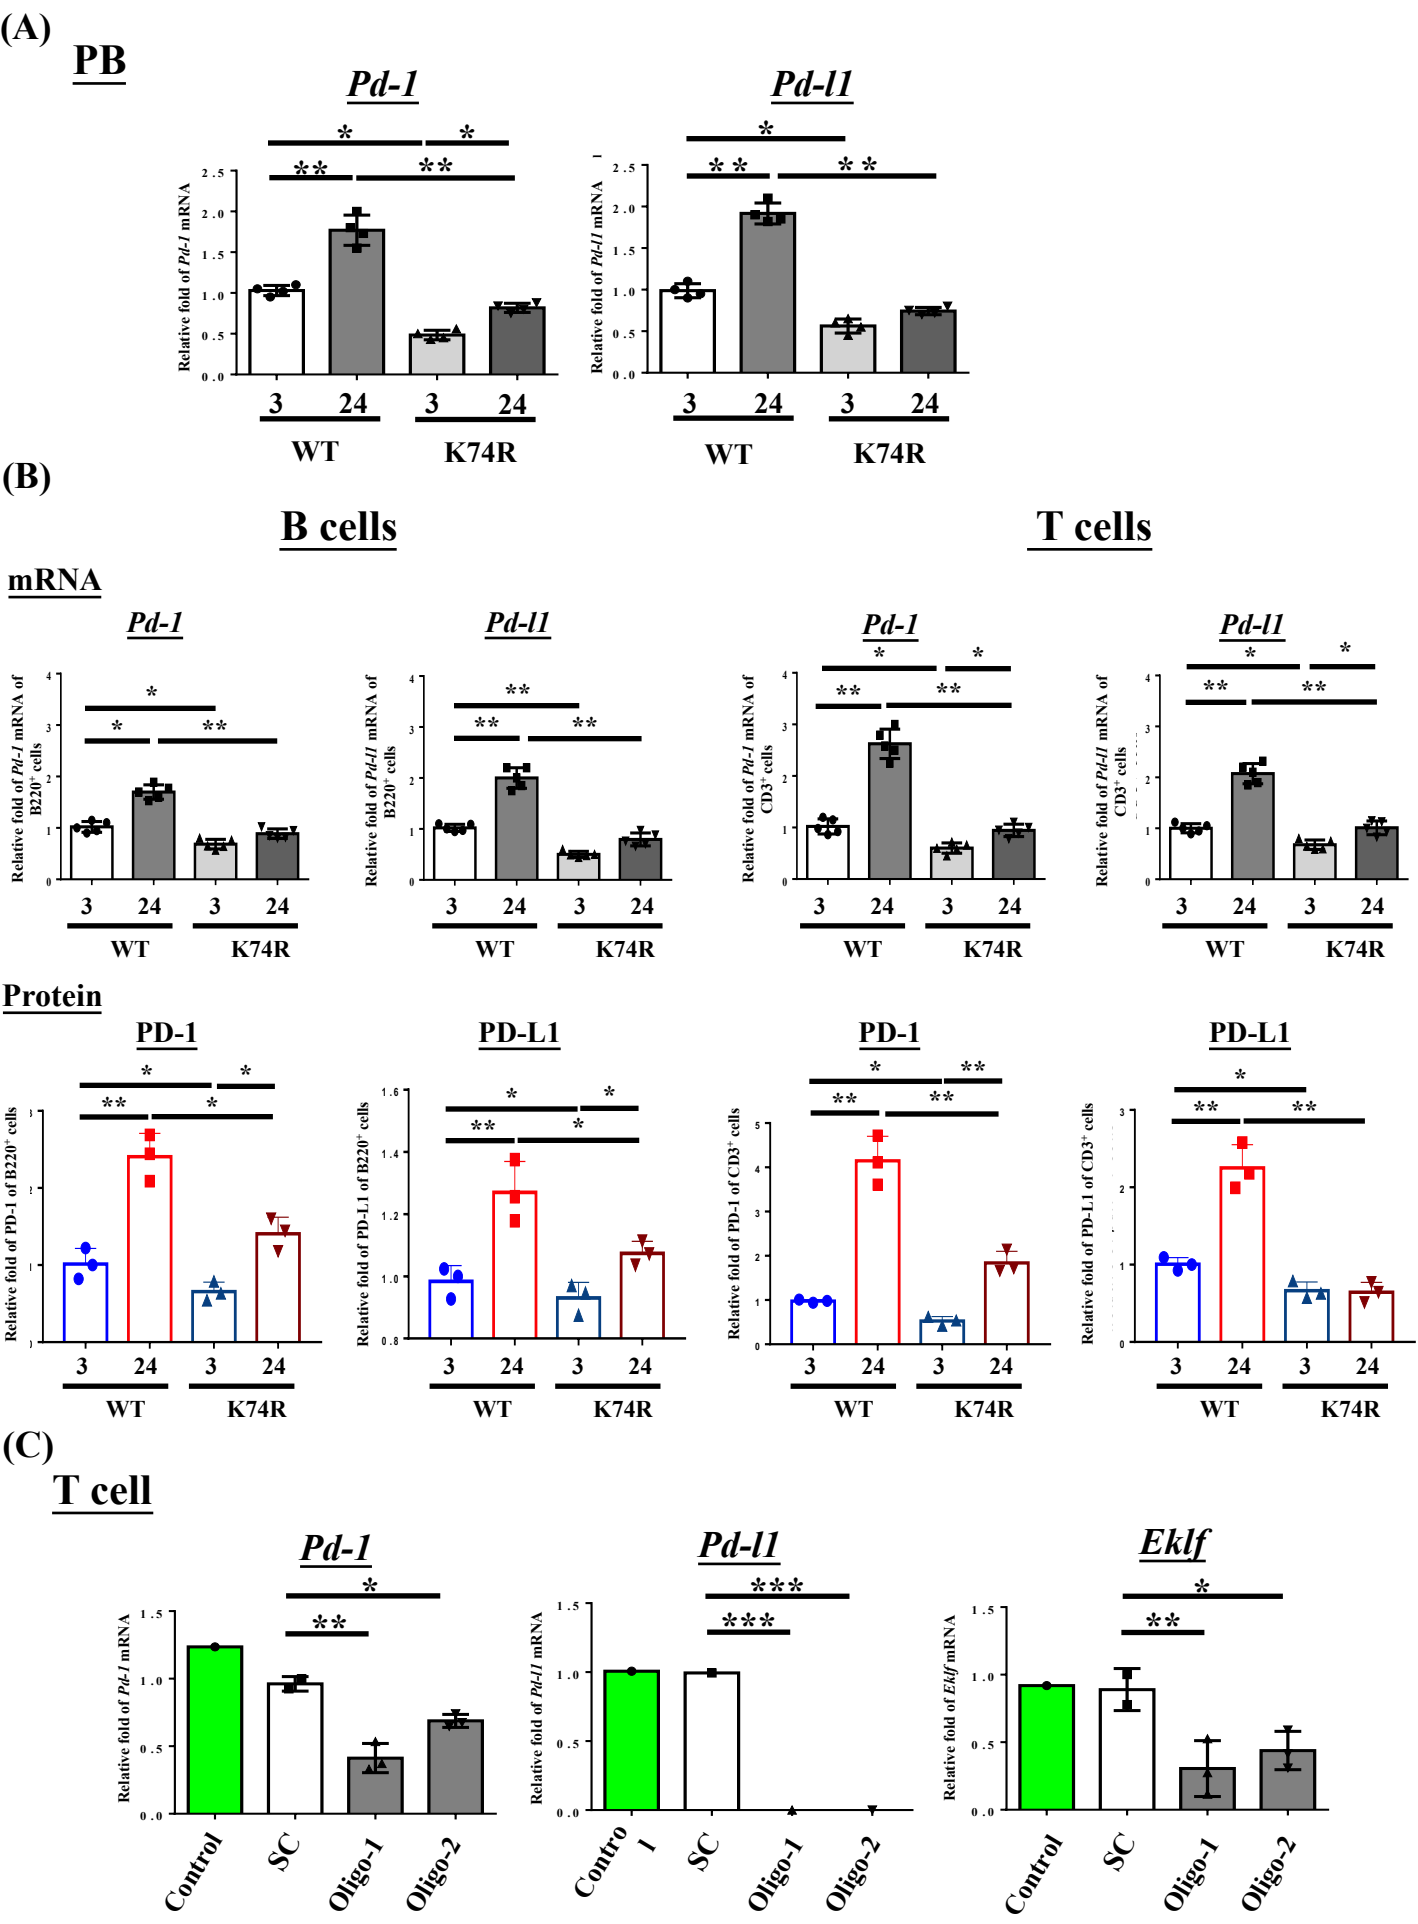

Source: https://www.biorxiv.org/content/10.1101/2023.04.21.537849v1.full.pdf
